# Supplementary material for: The combination of Radix Astragali and Radix Angelicae Sinensis attenuates the IFN-γ-induced immune destruction of hematopoiesis in bone marrow cells
Source: PubMed Central journal article supplement (PMC6902408; doi:10.1186/s12906-019-2781-4), 2019-12-09
Supplement: 12906_2019_2781_MOESM2_ESM.pdf [file 12906_2019_2781_MOESM2_ESM.pdf]

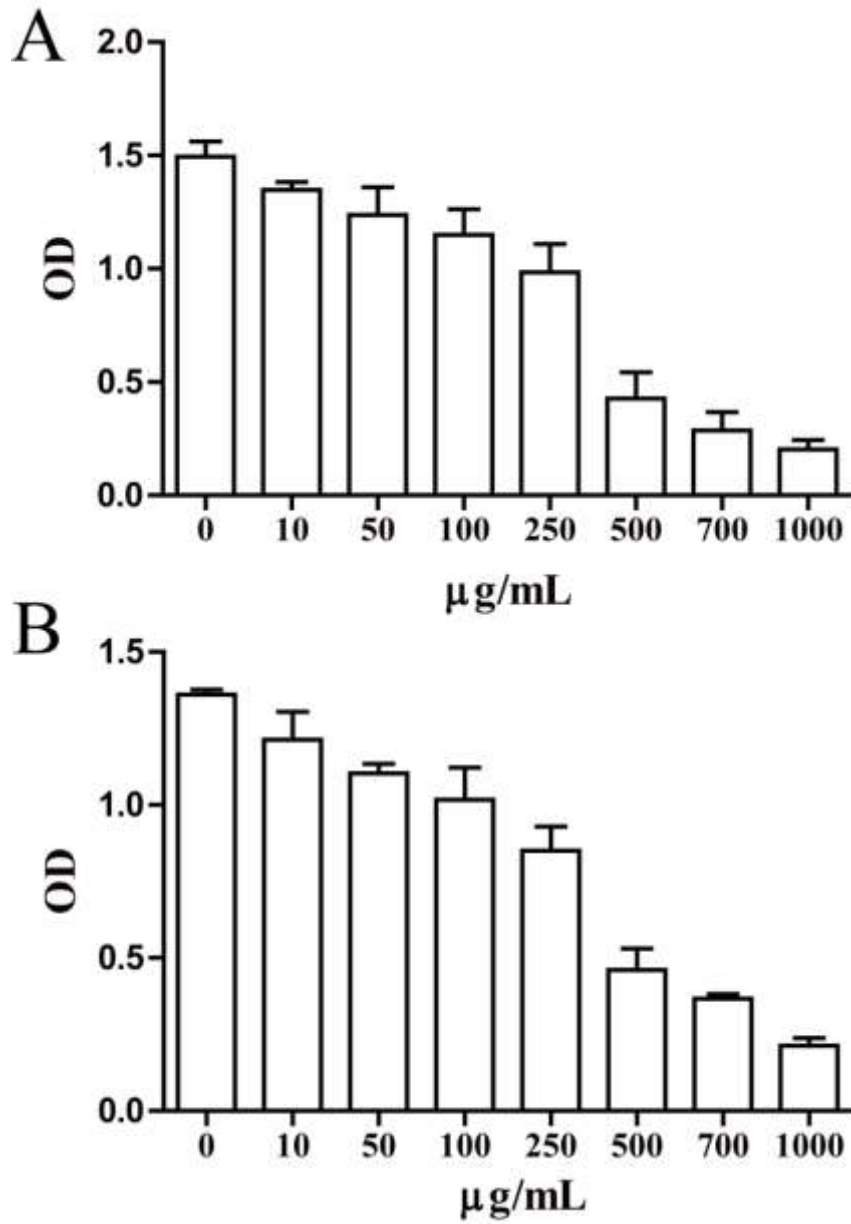

Figure S1: The cell viability of Bone marrow cells treated by RAS (A) and RA (B). Results were presented in a bar chart. Data were presented as mean  $\pm$  SD, n=3.
